# Supplementary material
Source: PubMed Central journal article supplement (PMC7002211)
Supplement: NIHMS1066209-supplement-supporting_information.pdf [file NIHMS1066209-supplement-supporting_information.pdf]

## Supporting information

### **Microfluidic platform for next-generation sequencing library preparation with low-input samples**

Travis W. Murphy, Yuan-Pang Hsieh, Bohan Zhu, Lynette B. Naler, and Chang Lu\*

Department of Chemical Engineering, Virginia Tech, Blacksburg, VA 24061

\* To whom correspondence should be addressed. E-mail: [changlu@vt.edu](mailto:changlu@vt.edu)

Fig. S1 on DNA size distribution before and after library preparation using the microfluidic device.

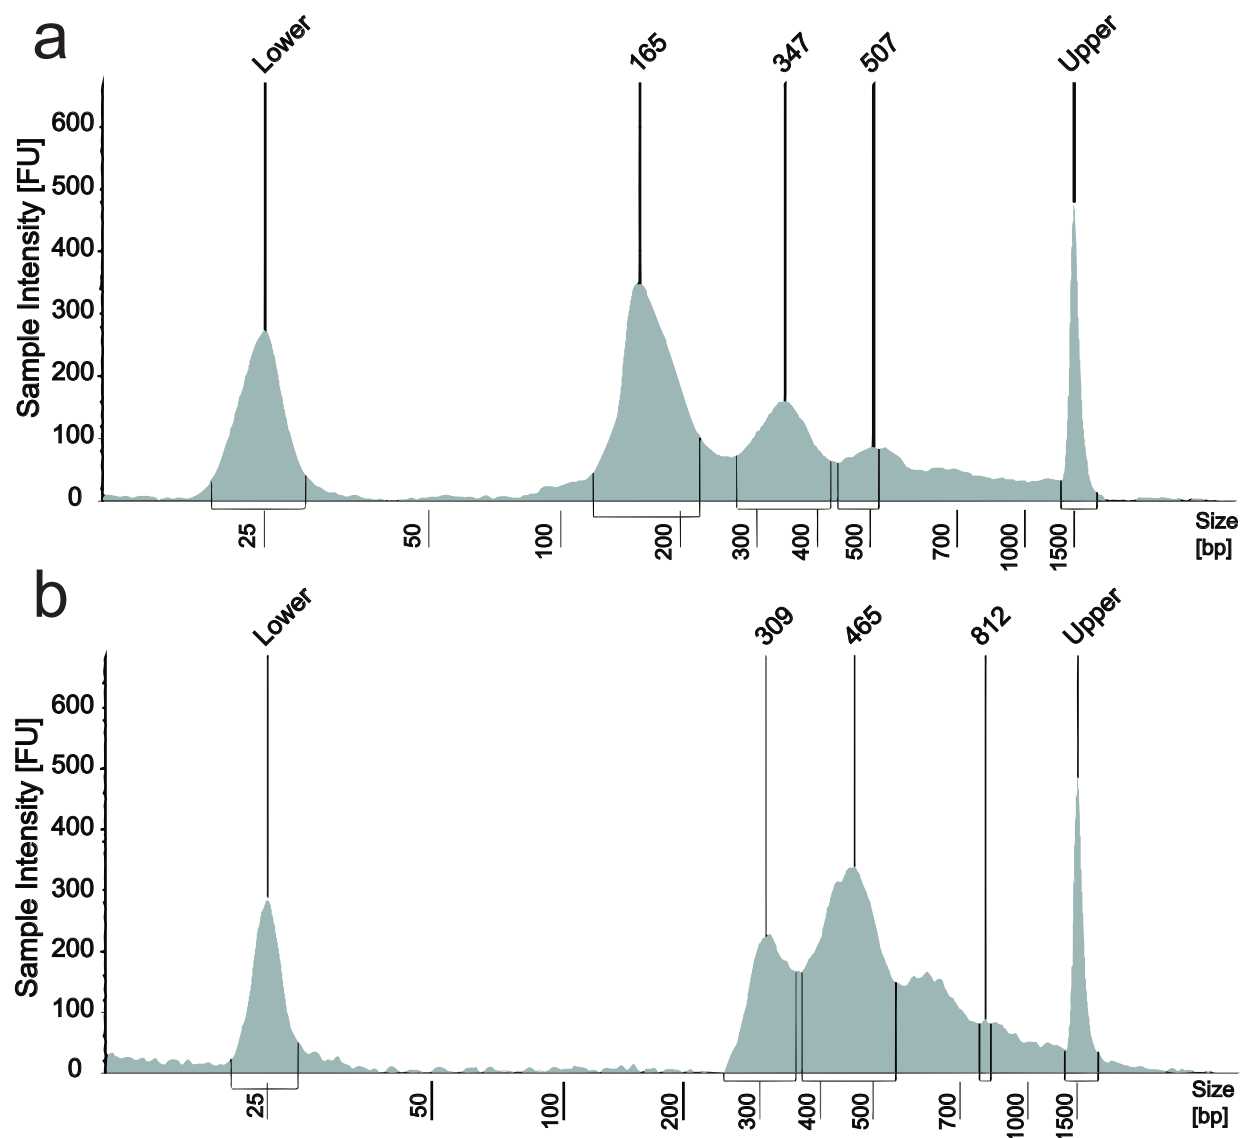

**Figure S1.** DNA size distribution measured by a TapeStation before and after library preparation using the microfluidic device. (a) DNA produced using MNase digestion from 10,000 mouse prefrontal cortex nuclei. (b) Sequencing library produced using the microfluidic device and 10 pg ChIP DNA on H3K4me3 of mouse prefrontal cortex nuclei.
